# Supplementary material
Source: MDPI journal article supplement (https://www.mdpi.com/2072-4292/12/18/3063)
Supplement: s1 [file s1]

# Certificate of English Language Editing

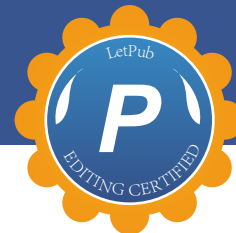

## Manuscript Title:

Retrieval and Validation of XCO<sub>2</sub> from TanSat Target Mode Observations in Beijing

## Date of Revision

August 28, 2020

### Abstract:

Satellite observation is one of the main methods used to monitor the global distribution and variation of atmospheric carbon dioxide (CO<sub>2</sub>). Several CO<sub>2</sub> monitoring satellites have been successfully launched, including Japan's Greenhouse Gases Observing SATellite (GOSAT), USA's Orbiting Carbon Observatory (OCO), and China's Carbon Dioxide Observation Satellite Mission (TanSat). Satellite observation targeting the ground-based Fourier-transform spectrometer (FTS) station is the most effective technique for validating satellite CO<sub>2</sub> measurement precision. In this study, the coincident observations from TanSat and ground-based FTS were performed numerous times in Beijing under a clear sky. The column-averaged dry-air mole fraction of carbon dioxide (XCO<sub>2</sub>) obtained from TanSat was retrieved by the Department for Eco-Environmental Informatics (DEEI) of China's State Key Laboratory of Resources and Environmental Information...

This document certifies that the manuscript listed above was copy edited for proper English language at LetPub. All of our language editors are native English speakers with long-term experience in editing scientific and technical manuscripts. We are committed to leveling the playing field for researchers whose native language is not English.

- Neither the research content nor the authors' intended meaning were altered in any way during the editing process.
- Documents receiving this certification should be considered ready for publication where language issues are concerned.  
*However, the authors may accept or reject LetPub's suggestions and changes at their own discretion.*
- If you have any questions or concerns about this edited document, please contact us at [support@letpub.com](mailto:support@letpub.com)

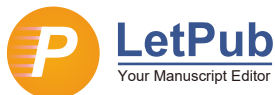

LetPub is an author service brand owned and operated by Accdon LLC. Headquartered in the Boston area, we are a full-spectrum author services company with a large team of US-based certified language and scientific editors, ISO 17001 accredited translators, and professional scientific illustrators and animators. We advocate ethical publication practices and are an official member of the Committee on Publication Ethics (COPE).

For more information about our company, services, and partnership programs, please visit [www.letpub.com](http://www.letpub.com).

© 2020 Accdon, LLC. All Rights Reserved. Tel: 1-781-202-9968 Email: [info@accdon.com](mailto:info@accdon.com) Address: 400 Fifth Ave, Suite 530, Waltham, MA 02451, United States
